# Supplementary material for: Association Between Statin Use and Progression of Arterial Stiffness Among Adults With High Atherosclerotic Risk
Source: PubMed Central journal article supplement (PMC9206193; doi:10.1001/jamanetworkopen.2022.18323), 2022-06-17
Supplement: jamanetwopen-e2218323-s001.pdf [file jamanetwopen-e2218323-s001.pdf]

## Supplemental Online Content

Zhou YF, Wang Y, Wang G, et al. Association between statin use and progression of arterial stiffness among adults with high atherosclerotic risk. *JAMA Netw Open*. 2022;5(6):e2218323. doi:10.1001/jamanetworkopen.2022.18323

### **eMethods.**

**eTable 1.** Baseline Characteristics for Participants Who Received the baPWV Measurement and Those Who Did Not

**eTable 2.** Baseline Characteristics of the Participants Before and After Propensity Score-Matching for Progression of baPWV Analysis

**eTable 3.** Baseline Characteristics for Participants Who Received Repeated baPWV Measurement and Those Who Did Not

**eTable 4.** Associations of Statin Use With Progression of baPWV: Stratified by the Achieved Lipid Goals

**eTable 5.** Sensitivity Analysis for Statin Use and Arterial Stiffness Status Using  $\geq 1800$  as Cutoff

**eTable 6.** Sensitivity Analysis for Statin Use and Progression of Arterial Stiffness in the Overall Study Participants Without Propensity-Matched Analysis

**eTable 7.** Sensitivity Analysis for Statin Use and Progression of Arterial Stiffness With Multivariable Adjustment in the Matched Sample

**eTable 8.** Sensitivity Analysis for Statin Use With Baseline baPWV and Progression of baPWV by Different Definition of Statin Discontinuation

**eTable 9.** Sensitivity Analysis for Statin Use and Progression of Arterial Stiffness by Including Those Who Had CVD During Follow-up in the Progression of Arterial Stiffness

**eFigure.** Subgroup Analyses for the Associations of Statin Use With baPWV and Its Progression According to Baseline Characteristics

This supplemental material has been provided by the authors to give readers additional information about their work.

## eMethods.

### Study participants

According to clinical guidelines, statin therapy was recommended in addition to lifestyle therapy for patients with hypertension, type 2 diabetes, dyslipidemia, obesity, or metabolic syndrome.<sup>1-3</sup> Hypertension was defined as defined self-reported hypertension, current use of antihypertensive medications, or persistently elevated blood pressure (systolic/diastolic blood pressure  $\geq 140/90$  mm Hg). Type 2 diabetes was defined as either fasting blood glucose (FBG)  $\geq 7.0$  mmol/L, self-report of a physician diagnosis, or self-reported use of antidiabetic medication. Dyslipidemia was defined as either or combination of serum total cholesterol (TC)  $\geq 6.2$  mmol/L (240 mg/dL), low-density lipoprotein cholesterol (LDL-C)  $\geq 4.1$  mmol/L (160 mg/dL), high-density lipoprotein cholesterol (HDL-C)  $< 1.04$  mmol/L (40 mg/dL), triglycerides  $\geq 2.3$  mmol/L (200 mg/dL), or self-reported use of lipid-lowering medication.<sup>2</sup> Obesity was defined as a body mass index (BMI)  $\geq 28$  kg/m<sup>2</sup> according to the Working Group on Obesity in China.<sup>4</sup> Metabolic health was defined in accordance with the National Cholesterol Education Program Adult Treatment Panel III (NECP-ATP-III) criteria for metabolic syndrome.<sup>3</sup>

### Assessment of covariates

The data collection procedure and variable definitions were described in detail in previous publications from the Kailuan study.<sup>5</sup> BMI was calculated as weight (kg) divided by height squared (m<sup>2</sup>). Participants who currently smoked were defined as current smokers, and those who currently drank were defined as current drinkers. Physical activity was evaluated from responses to questions regarding the frequency of physical activity ( $\geq 20$  min/time) during leisure time, and being physical active was defined as moderate or vigorous physical activity for  $\geq 80$  minutes per week.<sup>6</sup> Salt intake was assessed by asking participants to rate their habitual daily salt intake as 'low,' 'medium' or 'high' with a definition of  $< 6$  g/day, 6-12 g/day,  $\geq 12$  g/day, respectively, and salt light was defined as  $< 6$  g/day according to the standard salt spoon in China.<sup>6</sup>

All participants underwent blood tests after overnight fasting at each physical examination. The blood samples were analyzed using an auto-analyzer (Hitachi 747, Hitachi, Tokyo, Japan) at the central laboratory of Kailuan hospital.<sup>7</sup> Fasting blood glucose (FBG) was measured using the hexokinase/ glucose-6-phosphate dehydrogenase method (Mind Bioengineering Co Ltd, Shanghai, China) with an upper limit of detection of 30.07 mmol/L.<sup>7</sup>

### Statistical analysis

Because statin treatment was not randomized, substantial differences in baseline characteristics existed between participants who took statins and those who did not; therefore, a propensity score-matched analysis was applied. We included as many variables as possible in the propensity score model to reduce treatment selection bias, including age, sex, educational level (junior high school and below, senior high school and above), body mass index (BMI), MAP, fasting blood glucose (FBG), low-density lipoprotein cholesterol (LDL-C), high-density lipoprotein cholesterol (HDL-C), triglycerides, heart rate, hs-CRP ( $< 0.1$  and  $\geq 0.1$  mg/dL),<sup>7</sup> smoking habits (current smoker and non-current smoker), alcohol use (current drinker and non-current drinker), physical activity (physically active and physically inactive),<sup>6</sup> salt intake (self-reported light and non-light salt intake),<sup>5</sup> medications use (antidiabetic and antihypertensive drugs), atherosclerotic risk factors (dyslipidemia, type 2 diabetes, hypertension, metabolic syndrome, and obesity), and follow-up duration (for progression of baPWV only). Then, we calculated a propensity score for each subject, and subjects were matched one-to-one without replacement using a nearest-neighbour approach with a caliper width of 0.20 standard deviations (SD).<sup>8</sup> Standardized mean biases were evaluated to ensure balance after propensity score matching between the statin and non-statin groups, and a between-group difference of less than 0.10 was considered to be well balanced.<sup>9</sup>

### References

1. American Diabetes Association. 10. Cardiovascular Disease and Risk Management: Standards of Medical Care in Diabetes-2021. *Diabetes Care*. 2021;44:S125-S150. doi: 10.2337/dc21-S010
2. Joint Committee for Developing Chinese guidelines on Prevention and Treatment of Dyslipidemia in Adults. Chinese guidelines on prevention and treatment of dyslipidemia in adults [in Chinese]. *Zhonghua Xin Xue Guan Bing Za Zhi*. 2007;35:390-419.
3. Alberti KG, Eckel RH, Grundy SM, et al. Harmonizing the metabolic syndrome: a joint interim statement of the International Diabetes Federation Task Force on Epidemiology and Prevention; National Heart, Lung, and Blood Institute; American Heart Association; World

- Heart Federation; International Atherosclerosis Society; and International Association for the Study of Obesity. *Circulation*. 2009;120:1640-5. doi: 10.1161/CIRCULATIONAHA.109.192644
4. Pan XF, Wang L and Pan A. Epidemiology and determinants of obesity in China. *Lancet Diabetes Endocrinol*. 2021;9:373-392. doi: 10.1016/S2213-8587(21)00045-0
  5. Li Y, Huang Z, Jin C, et al. Longitudinal Change of Perceived Salt Intake and Stroke Risk in a Chinese Population. *Stroke*. 2018;49:1332-1339. doi: 10.1161/STROKEAHA.117.020277
  6. Wu S, Huang Z, Yang X, et al. Prevalence of ideal cardiovascular health and its relationship with the 4-year cardiovascular events in a northern Chinese industrial city. *Circ Cardiovasc Qual Outcomes*. 2012;5:487-93. doi: 10.1161/CIRCOUTCOMES.111.963694
  7. Wu Z, Huang Z, Jin W, et al. Peripheral Inflammatory Biomarkers for Myocardial Infarction Risk: A Prospective Community-Based Study. *Clin Chem*. 2017;63:663-672. doi: 10.1373/clinchem.2016.260828
  8. Seeger JD, Williams PL, Walker AM. An application of propensity score matching using claims data. *Pharmacoepidemiology and drug safety*. 2005;14(7):465-476. doi: 10.1002/pds.1062
  9. Austin PC. Balance diagnostics for comparing the distribution of baseline covariates between treatment groups in propensity-score matched samples. *Stat Med*. 2009;28(25):3083-3107. doi: 10.1002/sim.3697

**eTable 1.** Baseline Characteristics for Participants Who Received the baPWV Measurement and Those Who Did Not

| Variables                          | Received baPWV measurement (N=5242) | Did not receive baPWV measurement (N=8263) | Standardized differences |
|------------------------------------|-------------------------------------|--------------------------------------------|--------------------------|
| Mean (SD) age (years)              | 60.8 (9.7)                          | 51.3 (12.5)                                | 0.85                     |
| Men                                | 3948 (75.3)                         | 6249 (75.6)                                | -0.007                   |
| Mean (SD) MAP (mm Hg)              | 104.9 (13.8)                        | 99.7 (12.5)                                | 0.39                     |
| Mean (SD) BMI (kg/m <sup>2</sup> ) | 26.4 (3.4)                          | 26.0 (3.4)                                 | 0.12                     |
| Mean (SD) FBG (mg/dL)              | 120.7 (50.4)                        | 97.3 (28.8)                                | 0.57                     |
| Mean (SD) triglyceride (mg/dL)     | 194.7 (159.3)                       | 168.1 (123.9)                              | 0.19                     |
| Mean (SD) LDL-C (mg/dL)            | 96.5 (42.5)                         | 88.8 (30.9)                                | 0.21                     |
| Mean (SD) HDL-C (mg/dL)            | 57.9 (15.4)                         | 57.9 (15.4)                                | <0.001                   |
| Mean (SD) heart rate (bpm)         | 74.6 (10.7)                         | 73.4 (10.9)                                | 0.11                     |
| Elevated hs-CRP (≥0.1 mg/dL)       | 3265 (62.3)                         | 4218 (51.1)                                | 0.23                     |
| High school or higher              | 1385 (26.4)                         | 2983 (36.1)                                | -0.21                    |
| Light salt <sup>a</sup>            | 574 (11.0)                          | 1000 (12.7)                                | -0.05                    |
| Current smoker                     | 1839 (35.1)                         | 3501 (42.4)                                | -0.15                    |
| Alcohol drinking                   | 864 (16.5)                          | 1970 (23.8)                                | -0.18                    |
| Physically active <sup>b</sup>     | 948 (18.1)                          | 1689 (20.4)                                | -0.06                    |
| Comorbidities                      |                                     |                                            |                          |
| Hypertension                       | 4101 (78.2)                         | 4221 (51.1)                                | 0.59                     |
| Diabetes                           | 2327 (44.4)                         | 795 (9.6)                                  | 0.85                     |
| Dyslipidemia                       | 2622 (50.0)                         | 4207 (50.9)                                | -0.02                    |
| Metabolic syndrome                 | 2148 (41.0)                         | 2368 (28.7)                                | 0.26                     |
| Obesity                            | 1614 (30.8)                         | 2266 (27.4)                                | 0.07                     |
| Concurrent drug treatment          |                                     |                                            |                          |
| Antihypertensive drugs             | 2598 (49.6)                         | 2731 (33.1)                                | 0.34                     |
| Antidiabetic drugs                 | 1692 (32.3)                         | 575 (7.0)                                  | 0.67                     |

baPWV=brachial-ankle pulse wave velocity; BMI=body mass index; CVD=cardiovascular disease; FBG=fasting blood glucose; MAP=mean arterial pressure; LDL-C=low-density lipoprotein cholesterol; HDL-C=high density lipoprotein cholesterol; hs-CRP=high-sensitivity C-reactive protein.

<sup>a</sup> A light salt was defined as <6 g/day according to the standard salt spoon in China.

<sup>b</sup> Being physically active was defined as moderate or vigorous physical activity for ≥80 minutes per week.

SI conversion factor: To convert FBG to millimoles per liter, multiply by 0.0555; triglyceride to millimoles per liter, multiply by 0.0113; LDL-C and HDL-C to millimoles per liter, multiply by 0.0259.

**eTable 2.** Baseline Characteristics of the Participants Before and After Propensity Score-Matching for Progression of baPWV Analysis

| Variables                          | Before matching (n=1502) |                          | Standardized Mean Difference | After matching (n=820) |                          | Standardized Mean Difference |
|------------------------------------|--------------------------|--------------------------|------------------------------|------------------------|--------------------------|------------------------------|
|                                    | Statin group (n=503)     | Non-statin group (n=999) |                              | Statin group (n=410)   | Non-statin group (n=410) |                              |
| Mean (SD) baseline age (years)     | 63.7 (9.1)               | 58.9 (9.9)               | 0.50                         | 63.4 (9.1)             | 62.3 (9.6)               | 0.12                         |
| Mean (SD) baseline baPWV (cm/s)    | 1786.5 (373.7)           | 1727.7 (377.3)           | 0.17                         | 1778.8 (372.9)         | 1799.0 (401.8)           | -0.05                        |
| Mean (SD) duration (years)         | 5.2 (2.8)                | 4.1 (2.3)                | 0.40                         | 5.0 (2.8)              | 4.5 (2.5)                | 0.17                         |
| Men                                | 333 (66.2)               | 684 (68.5)               | -0.05                        | 269 (65.6)             | 280 (68.3)               | -0.06                        |
| Mean (SD) BMI (kg/m <sup>2</sup> ) | 26.7 (3.3)               | 26.4 (3.4)               | 0.12                         | 26.5 (3.2)             | 26.5 (3.3)               | <0.001                       |
| Mean (SD) MAP (mm Hg)              | 104.3 (13.5)             | 103.6 (13.7)             | 0.06                         | 104.6 (13.5)           | 105.3 (14.1)             | -0.05                        |
| Mean (SD) FBG (mg/dL)              | 118.9 (48.6)             | 122.5 (50.4)             | -0.08                        | 122.5 (50.4)           | 124.3 (46.8)             | -0.04                        |
| Mean (SD) triglyceride (mg/dL)     | 203.5 (150.4)            | 203.5 (177.0)            | -0.01                        | 203.5 (150.4)          | 203.5 (168.1)            | -0.002                       |
| Mean (SD) LDL-C (mg/dL)            | 88.8 (38.6)              | 92.7 (34.7)              | -0.13                        | 92.7 (38.6)            | 92.7 (34.7)              | -0.04                        |
| Mean (SD) HDL-C (mg/dL)            | 57.9 (15.4)              | 57.9 (15.4)              | 0.03                         | 57.9 (15.4)            | 56.0 (15.4)              | 0.08                         |
| Mean (SD) heart rate (bpm)         | 73.8 (11.0)              | 74.6 (10.3)              | -0.07                        | 74.5 (11.4)            | 74.1 (10.2)              | 0.04                         |
| Elevated hs-CRP (≥0.1 mg/dL)       | 336 (66.8)               | 624 (62.5)               | 0.09                         | 278 (67.8)             | 277 (67.6)               | 0.01                         |
| High school or higher              | 177 (35.2)               | 372 (37.2)               | -0.04                        | 144 (35.1)             | 164 (40.0)               | -0.10                        |
| Light salt <sup>a</sup>            | 57 (11.3)                | 110 (11.0)               | 0.01                         | 46 (11.2)              | 50 (12.2)                | -0.03                        |
| Current smoker                     | 172 (34.2)               | 339 (34.0)               | 0.01                         | 138 (33.7)             | 134 (32.7)               | 0.02                         |
| Alcohol drinking                   | 77 (15.3)                | 174 (17.4)               | -0.06                        | 61 (14.9)              | 63 (15.4)                | -0.01                        |
| Physically active <sup>b</sup>     | 101 (20.1)               | 162 (16.2)               | 0.10                         | 88 (21.5)              | 74 (18.1)                | 0.09                         |
| Comorbidities                      |                          |                          |                              |                        |                          |                              |
| Hypertension                       | 473 (94.0)               | 764 (76.5)               | 0.51                         | 380 (92.7)             | 378 (92.2)               | 0.01                         |
| Diabetes                           | 337 (67.0)               | 554 (55.5)               | 0.24                         | 270 (65.9)             | 268 (65.4)               | 0.01                         |
| Dyslipidemia                       | 267 (53.1)               | 499 (50.0)               | 0.06                         | 216 (52.7)             | 216 (52.7)               | 0.00                         |
| Metabolic syndrome                 | 243 (48.3)               | 439 (44.0)               | 0.09                         | 198 (48.3)             | 215 (52.4)               | -0.07                        |
| Obesity                            | 154 (30.6)               | 296 (29.6)               | 0.02                         | 124 (30.2)             | 130 (31.7)               | -0.03                        |
| Concurrent drug treatment          |                          |                          |                              |                        |                          |                              |
| Antihypertensive drug              | 432 (85.9)               | 346 (34.6)               | 1.23                         | 339 (82.7)             | 339 (82.7)               | 0.00                         |
| Antidiabetic drug                  | 276 (54.9)               | 334 (33.4)               | 0.44                         | 221 (53.9)             | 208 (25.4)               | 0.06                         |

baPWV=brachial-ankle pulse wave velocity; BMI=body mass index; CVD=cardiovascular disease; FBG=fasting blood glucose; MAP=mean arterial pressure; LDL-C=low-density lipoprotein cholesterol; HDL-C=high density lipoprotein cholesterol; hs-CRP=high-sensitivity C-reactive protein.

<sup>a</sup> A light salt was defined as <6 g/day according to the standard salt spoon in China.

<sup>b</sup> Being physically active was defined as moderate or vigorous physical activity for ≥80 minutes per week.

SI conversion factor: To convert FBG to millimoles per liter, multiply by 0.0555; triglyceride to millimoles per liter, multiply by 0.0113; LDL-C and HDL-C to millimoles per liter, multiply by 0.0259.

**eTable 3.** Baseline Characteristics for Participants Who Received Repeated baPWV Measurement and Those Who Did Not

| Variables                          | Received repeated baPWV measurement (N=1619) | Did not receive repeated baPWV measurement (N=3486) | Standardized differences |
|------------------------------------|----------------------------------------------|-----------------------------------------------------|--------------------------|
| Mean (SD) age (years)              | 60.9 (9.9)                                   | 60.7 (9.7)                                          | 0.02                     |
| Men                                | 1101 (68.0)                                  | 2741 (78.6)                                         | -0.24                    |
| Mean (SD) MAP (mm Hg)              | 103.8 (13.5)                                 | 105.4 (13.8)                                        | -0.12                    |
| Mean (SD) BMI (kg/m <sup>2</sup> ) | 26.5 (3.4)                                   | 26.4 (3.4)                                          | 0.03                     |
| Mean (SD) FBG (mg/dL)              | 120.7 (48.6)                                 | 122.5 (52.3)                                        | -0.04                    |
| Mean (SD) triglyceride (mg/dL)     | 203.5 (168.1)                                | 185.8 (150.4)                                       | 0.11                     |
| Mean (SD) LDL-C (mg/dL)            | 92.7 (34.7)                                  | 96.5 (46.3)                                         | -0.09                    |
| Mean (SD) HDL-C (mg/dL)            | 57.9 (15.4)                                  | 57.9 (14.7)                                         | <0.001                   |
| Mean (SD) heart rate (bpm)         | 74.3 (10.9)                                  | 74.7 (10.7)                                         | -0.04                    |
| Elevated hs-CRP (≥0.1 mg/dL)       | 1045 (64.6)                                  | 2133 (61.2)                                         | 0.07                     |
| High school or higher              | 587 (36.3)                                   | 762 (21.9)                                          | 0.32                     |
| Light salt <sup>a</sup>            | 178 (11.0)                                   | 377 (10.8)                                          | 0.006                    |
| Current smoker                     | 552 (34.1)                                   | 1243 (35.7)                                         | -0.03                    |
| Alcohol drinking                   | 265 (16.4)                                   | 574 (16.5)                                          | -0.003                   |
| Physically active <sup>b</sup>     | 278 (17.2)                                   | 645 (18.5)                                          | -0.03                    |
| Comorbidities                      |                                              |                                                     |                          |
| Hypertension                       | 1333 (82.3)                                  | 2736 (78.5)                                         | 0.09                     |
| Diabetes                           | 960 (59.3)                                   | 1345 (38.6)                                         | 0.42                     |
| Dyslipidemia                       | 827 (51.1)                                   | 1271 (49.4)                                         | 0.03                     |
| Metabolic syndrome                 | 732 (45.2)                                   | 1359 (39.0)                                         | 0.12                     |
| Obesity                            | 503 (31.1)                                   | 1052 (30.2)                                         | 0.02                     |
| Concurrent drug treatment          |                                              |                                                     |                          |
| Antihypertensive drugs             | 885 (54.7)                                   | 1645 (47.2)                                         | 0.15                     |
| Antidiabetic drugs                 | 638 (39.4)                                   | 1010 (29.0)                                         | 0.22                     |

baPWV=brachial-ankle pulse wave velocity; BMI=body mass index; CVD=cardiovascular disease; FBG=fasting blood glucose; MAP=mean arterial pressure; LDL-C=low-density lipoprotein cholesterol; HDL-C=high density lipoprotein cholesterol; hs-CRP=high-sensitivity C-reactive protein.

<sup>a</sup> A light salt was defined as <6 g/day according to the standard salt spoon in China.

<sup>b</sup> Being physically active was defined as moderate or vigorous physical activity for ≥80 minutes per week.

SI conversion factor: To convert FBG to millimoles per liter, multiply by 0.0555; triglyceride to millimoles per liter, multiply by 0.0113; LDL-C and HDL-C to millimoles per liter, multiply by 0.0259.

**eTable 4.** Associations of Statin Use With Progression of baPWV: Stratified by the Achieved Lipid Goals

| Variables           | Full population (N=1502) |                                  | Matched population (N=820) |                                  |
|---------------------|--------------------------|----------------------------------|----------------------------|----------------------------------|
|                     | N                        | Difference (95% CI) <sup>a</sup> | N                          | Difference (95% CI) <sup>b</sup> |
| Achieved LDL-C goal |                          |                                  |                            |                                  |
| LDL-C < 131.3 mg/dL | 450                      | -18.8 (-35.0 to -2.6)            | 362                        | -24.7 (-42.6 to -6.9)            |
| LDL-C ≥ 131.3 mg/dL | 53                       | -9.3 (-44.8 to 26.1)             | 48                         | -12.6 (-50.2 to 24.9)            |
| Non-statin users    | 999                      | reference                        | 410                        | reference                        |

<sup>a</sup> Adjusted for sex, baseline age, educational level, MAP, FBG, LDL-C, HDL-C, triglycerides, heart rate, hs-CRP, physical activity, drinking habits, smoking status, salt intake, antihypertensive drugs, antidiabetic drugs, dyslipidemia, type 2 diabetes, hypertension, metabolic syndrome, and obesity, as well as baseline baPWV and duration of baPWV measurement.

<sup>b</sup> Adjusted for age, baseline baPWV, and duration of baPWV measurement.

SI conversion factor: To convert LDL-C to millimoles per liter, multiply by 0.0259.



**eTable 5.** Sensitivity Analysis for Statin Use and Arterial Stiffness Status Using  $\geq 1800$  as Cutoff

| Variables                           | The full population (N=5105) |                          | The matched population (N=2620) |                          |
|-------------------------------------|------------------------------|--------------------------|---------------------------------|--------------------------|
|                                     | N                            | OR (95% CI) <sup>a</sup> | N                               | OR (95% CI) <sup>b</sup> |
| All population                      |                              |                          |                                 |                          |
| Statin users                        | 1571                         | 0.85 (0.72 to 0.99)      | 1310                            | 0.83 (0.70 to 0.98)      |
| Non-statin users                    | 3534                         | reference                | 1310                            | reference                |
| Statin discontinuation <sup>c</sup> |                              |                          |                                 |                          |
| Continuation                        | 1255                         | 0.82 (0.70 to 0.97)      | 1050                            | 0.82 (0.69 to 0.98)      |
| Discontinuation                     | 316                          | 0.95 (0.73 to 1.25)      | 260                             | 0.87 (0.65 to 1.16)      |
| Non-statin users                    | 3534                         | reference                | 1310                            | reference                |
| Statin adherence <sup>d</sup>       |                              |                          |                                 |                          |
| High adherence                      | 547                          | 0.69 (0.56 to 0.86)      | 448                             | 0.68 (0.54 to 0.86)      |
| Low adherence                       | 1024                         | 0.94 (0.79 to 1.11)      | 862                             | 0.92 (0.76 to 1.11)      |
| Non-statin users                    | 3534                         | reference                | 1310                            | reference                |
| Statin type <sup>e</sup>            |                              |                          |                                 |                          |
| Hydrophilic statins                 | 370                          | 0.80 (0.62 to 1.04)      | 302                             | 0.76 (0.57 to 1.01)      |
| Lipophilic statins                  | 1201                         | reference                | 1008                            | reference                |

baPWV, brachial-ankle pulse wave velocity; CI, confidence interval; OR, odds ratio.

<sup>a</sup> Adjusted for age, sex, and educational level, MAP, FBG, LDL-C, HDL-C, triglycerides, heart rate, hs-CRP, physical activity, drinking habits, smoking status, salt intake, antihypertensive, antidiabetic drugs, dyslipidemia, type 2 diabetes, hypertension, metabolic syndrome, and obesity.

<sup>b</sup> Adjusted for age, MAP, and FBG.

<sup>c</sup> Statin discontinuations were identified as the absence of statin prescriptions for 12 consecutive months within the first 2 years of outcome measurements.

<sup>d</sup> Medication adherence in the statin group was measured by the medication possession ratio (MPR). High adherence was categorized with MPR values  $\geq 80\%$  and low adherence was categorized with MPR values  $< 80\%$ .

<sup>e</sup> Statin type was defined as hydrophilic statins (pravastatin and rosuvastatin) and lipophilic statins (atorvastatin, simvastatin, fluvastatin, lovastatin, and pitavastatin); since few participants were hydrophilic users only (n=74 in the full population and n=59 in the matched population) or mixed users of hydrophilic and lipophilic statin (n=296 in the full population and n=243 in the matched population), they were coalesced into hydrophilic group.

**eTable 6.** Sensitivity Analysis for Statin Use and Progression of Arterial Stiffness in the Overall Study Participants Without Propensity-Matched Analysis

| Variables                           | Baseline baPWV (N=5105) |                          | Progression of baPWV (N=1502) |                          |
|-------------------------------------|-------------------------|--------------------------|-------------------------------|--------------------------|
|                                     | N                       | OR (95% CI) <sup>a</sup> | N                             | OR (95% CI) <sup>b</sup> |
| All population                      |                         |                          |                               |                          |
| Statin users                        | 1571                    | -30.0 (-54.9 to -5.2)    | 503                           | -18.2 (-34.0 to -2.5)    |
| Non-statin users                    | 3534                    | reference                | 999                           | reference                |
| Statin discontinuation <sup>c</sup> |                         |                          |                               |                          |
| Continuation                        | 1255                    | -41.2 (-67.5 to -15.0)   | 435                           | -19.4 (-35.7 to -3.2)    |
| Discontinuation                     | 316                     | 15.7 (-27.2 to 58.6)     | 68                            | -7.3 (-39.5 to 24.8)     |
| Non-statin users                    | 3534                    | reference                | 999                           | reference                |
| Statin adherence <sup>d</sup>       |                         |                          |                               |                          |
| High adherence                      | 547                     | -81.6 (-116.3 to -46.8)  | 127                           | -25.9 (-50.6 to -1.2)    |
| Low adherence                       | 1024                    | -3.2 (-31.1 to 24.7)     | 376                           | -15.1 (-32.1 to 1.8)     |
| Non-statin users                    | 3534                    | reference                | 999                           | reference                |
| Statin type <sup>e</sup>            |                         |                          |                               |                          |
| Hydrophilic statins                 | 370                     | -45.7 (-87.6 to -3.8)    | 115                           | -8.8 (-33.6 to 16.0)     |
| Lipophilic statins                  | 1201                    | reference                | 388                           | reference                |

baPWV, brachial-ankle pulse wave velocity; CI, confidence interval.

<sup>a</sup> Adjusted for sex, baseline age, educational level, MAP, FBG, LDL-C, HDL-C, triglycerides, heart rate, hs-CRP, physical activity, drinking habits, smoking status, salt intake, antihypertensive drugs, antidiabetic drugs, dyslipidemia, type 2 diabetes, hypertension, metabolic syndrome, and obesity.

<sup>b</sup> Adjusted for sex, baseline age, educational level, MAP, FBG, LDL-C, HDL-C, triglycerides, heart rate, hs-CRP, physical activity, drinking habits, smoking status, salt intake, antihypertensive drugs, antidiabetic drugs, dyslipidemia, type 2 diabetes, hypertension, metabolic syndrome, and obesity, as well as baseline baPWV and duration of baPWV measurement.

<sup>c</sup> Statin discontinuations were identified as the absence of statin prescriptions for 12 consecutive months within the first 2 years of outcome measurements.

<sup>d</sup> Medication adherence in the statin group was measured by the medication possession ratio (MPR). High adherence was categorized with MPR values  $\geq 80\%$  and low adherence was categorized with MPR values  $< 80\%$ .

<sup>e</sup> Statin type was defined as hydrophilic statins (pravastatin and rosuvastatin) and lipophilic statins (atorvastatin, simvastatin, fluvastatin, lovastatin, and pitavastatin); since few participants were hydrophilic users only (n=74 in baseline baPWV analysis and n=23 in progression of baPWV analysis) or mixed users of hydrophilic and lipophilic statin (n=296 in baseline baPWV analysis and n=92 in progression of baPWV analysis), they were coalesced into hydrophilic group.

**eTable 7.** Sensitivity Analysis for Statin Use and Progression of Arterial Stiffness With Multivariable Adjustment in the Matched Sample

| Variables                           | Baseline baPWV (N=2620) |                                  | Progression of baPWV (N=820) |                                  |
|-------------------------------------|-------------------------|----------------------------------|------------------------------|----------------------------------|
|                                     | N                       | Difference (95% CI) <sup>a</sup> | N                            | Difference (95% CI) <sup>b</sup> |
| All population                      |                         |                                  |                              |                                  |
| Statin users                        | 1310                    | -35.8 (-64.0 to -7.6)            | 410                          | -25.2 (-43.0 to -7.5)            |
| Non-statin users                    | 1310                    | reference                        | 410                          | reference                        |
| Statin discontinuation <sup>c</sup> |                         |                                  |                              |                                  |
| Continuation                        | 1050                    | -39.1 (-68.9 to -9.2)            | 354                          | -25.4 (-43.9 to -7.0)            |
| Discontinuation                     | 260                     | -22.2 (-70.7 to 26.3)            | 56                           | -23.7 (-59.8 to 12.4)            |
| Non-statin users                    | 1310                    | reference                        | 410                          | reference                        |
| Statin adherence <sup>d</sup>       |                         |                                  |                              |                                  |
| High adherence                      | 448                     | -71.5 (-111.2 to -31.8)          | 103                          | -39.9 (-67.9 to -11.9)           |
| Low adherence                       | 862                     | -17.8 (-49.3 to 13.7)            | 307                          | -20.4 (-39.5 to -1.2)            |
| Non-statin users                    | 1310                    | reference                        | 410                          | reference                        |
| Statin type <sup>e</sup>            |                         |                                  |                              |                                  |
| Hydrophilic statins                 | 302                     | -53.8 (-99.4 to -8.1)            | 84                           | -20.5 (-49.9 to 8.9)             |
| Lipophilic statins                  | 1008                    | reference                        | 326                          | reference                        |

baPWV, brachial-ankle pulse wave velocity; CI, confidence interval.

<sup>a</sup> Adjusted for sex, baseline age, educational level, MAP, FBG, LDL-C, HDL-C, triglycerides, heart rate, hs-CRP, physical activity, drinking habits, smoking status, salt intake, dyslipidemia, type 2 diabetes, hypertension, metabolic syndrome, obesity, antihypertensive drugs, and antidiabetic drugs.

<sup>b</sup> Adjusted for sex, baseline age, educational level, baseline baPWV, duration of baPWV measurement, and the following variables at baseline and follow-up: MAP, FBG, LDL-C, HDL-C, triglycerides, heart rate, hs-CRP, physical activity, drinking habits, smoking status, salt intake, dyslipidemia, type 2 diabetes, hypertension, metabolic syndrome, obesity, antihypertensive drugs, and antidiabetic drugs.

<sup>c</sup> Statin discontinuations were identified as the absence of statin prescriptions for 12 consecutive months within the first 2 years of outcome measurements.

<sup>d</sup> Medication adherence in the statin group was measured by the medication possession ratio (MPR). High adherence was categorized with MPR values  $\geq 80\%$  and low adherence was categorized with MPR values  $< 80\%$ .

<sup>e</sup> Statin type was defined as hydrophilic statins (pravastatin and rosuvastatin) and lipophilic statins (atorvastatin, simvastatin, fluvastatin, lovastatin, and pitavastatin); since few participants were hydrophilic users only (n=59 in baseline baPWV analysis and n=17 in progression of baPWV analysis) or mixed users of hydrophilic and lipophilic statin (n=243 in baseline baPWV analysis and n=67 in progression of baPWV analysis), they were coalesced into hydrophilic group.

**eTable 8.** Sensitivity Analysis for Statin Use With Baseline baPWV and Progression of baPWV by Different Definition of Statin Discontinuation

| Variables                           | Baseline baPWV (N=2620) |                                  | Progression of baPWV (N=820) |                                  |
|-------------------------------------|-------------------------|----------------------------------|------------------------------|----------------------------------|
|                                     | N                       | Difference (95% CI) <sup>a</sup> | N                            | Difference (95% CI) <sup>b</sup> |
| Statin discontinuation <sup>c</sup> |                         |                                  |                              |                                  |
| Absence of statins for 3 months     |                         |                                  |                              |                                  |
| Continuation                        | 698                     | -38.3 (-69.5 to -7.1)            | 268                          | -25.0 (-44.3 to -5.6)            |
| Discontinuation                     | 612                     | -22.3 (-63.9 to 19.4)            | 142                          | -19.7 (-43.7 to 4.3)             |
| Non-statin users                    | 1310                    | reference                        | 410                          | reference                        |
| Absence of statins for 6 months     |                         |                                  |                              |                                  |
| Continuation                        | 917                     | -35.3 (-69.1 to -1.5)            | 334                          | -23.7 (-41.9 to -5.5)            |
| Discontinuation                     | 393                     | -31.5 (-67.2 to 4.2)             | 76                           | -21.4 (-52.3 to 9.4)             |
| Non-statin users                    | 1310                    | reference                        | 410                          | reference                        |

baPWV=brachial-ankle pulse wave velocity; CI=confidence interval.

<sup>a</sup> Adjusted for age, MAP, and FBG.

<sup>b</sup> Adjusted for age, baseline baPWV, and duration of baPWV measurement.

<sup>c</sup> Statin discontinuations were identified as the absence of statin prescriptions for 3 or 6 consecutive months within the first 2 years of outcome measurements.

**eTable 9.** Sensitivity Analysis for Statin Use and Progression of Arterial Stiffness by Including Those Who Had CVD During Follow-up in the Progression of Arterial Stiffness

| Variables                           | Progression of baPWV |                                  |
|-------------------------------------|----------------------|----------------------------------|
|                                     | N                    | Difference (95% CI) <sup>a</sup> |
| All population                      | 1551                 |                                  |
| Statin group                        | 543                  | -16.0 (-31.6 to -0.3)            |
| Non-statin users                    | 1008                 | reference                        |
| Statin discontinuation <sup>b</sup> |                      |                                  |
| Continuation                        | 463                  | -19.6 (-38.7 to -0.4)            |
| Discontinuation                     | 80                   | -8.3 (-28.4 to 11.8)             |
| Non-statin users                    | 1008                 | reference                        |
| Statin adherence <sup>c</sup>       |                      |                                  |
| High adherence                      | 146                  | -22.4 (-47.6 to 2.8)             |
| Low adherence                       | 397                  | -11.7 (-29.2 to 5.8)             |
| Non-statin users                    | 1008                 | reference                        |
| Statin type <sup>d</sup>            |                      |                                  |
| Hydrophilic statins                 | 129                  | -8.4 (-34.9 to 18.0)             |
| Lipophilic statins                  | 414                  | reference                        |

baPWV, brachial-ankle pulse wave velocity; CI, confidence interval.

<sup>a</sup> Adjusted for sex, baseline age, educational level, occupational type, MAP, FBG, LDL-C, HDL-C, triglycerides, heart rate, hs-CRP, physical activity, drinking habits, smoking status, salt intake, antihypertensive drugs, antidiabetic drugs, dyslipidemia, type 2 diabetes, hypertension, metabolic syndrome, and obesity, as well as baseline baPWV and duration of baPWV measurement.

<sup>b</sup> Statin discontinuations were identified as the absence of statin prescriptions for 12 consecutive months within the first 2 years of outcome measurements.

<sup>c</sup> Medication adherence in the statin group was measured by the medication possession ratio (MPR). High adherence was categorized with MPR values  $\geq 80\%$  and low adherence was categorized with MPR values  $< 80\%$ .

<sup>d</sup> Statin type was defined as hydrophilic statins (pravastatin and rosuvastatin) and lipophilic statins (atorvastatin, simvastatin, fluvastatin, lovastatin, and pitavastatin); since few participants were hydrophilic users only (n=25) or mixed users of hydrophilic and lipophilic statin (n=104), they were coalesced into hydrophilic group.

**eFigure.** Subgroup Analyses for the Associations of Statin Use With baPWV and Its Progression According to Baseline Characteristics

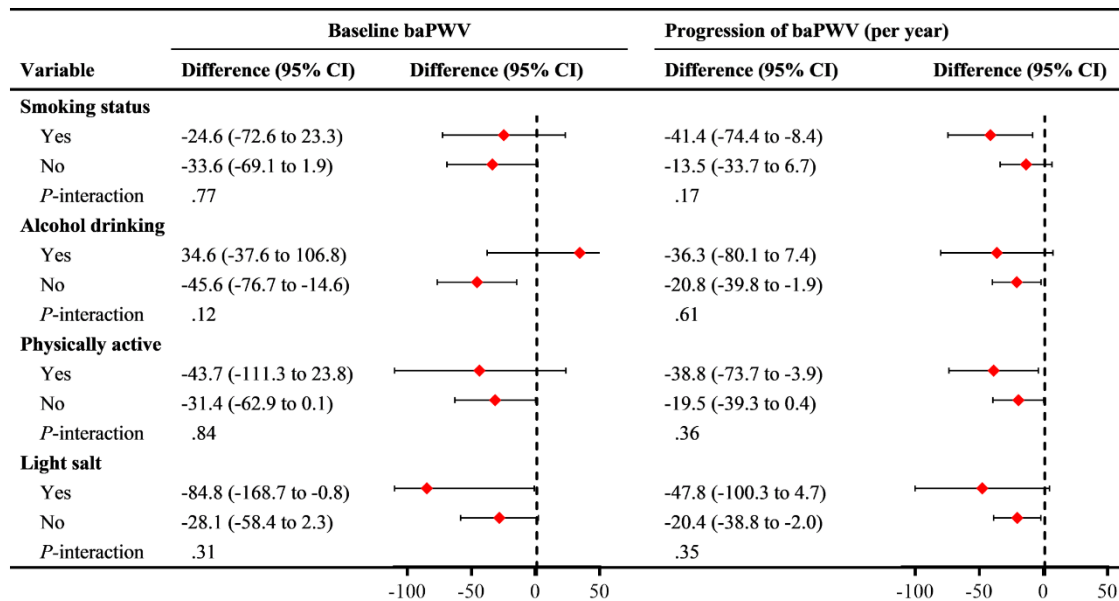

baPWV=brachial-ankle pulse wave velocity; CI=confidence interval.
